# Supplementary material for: Internalization of Heterologous Sugar Transporters by Endogenous α-Arrestins in the Yeast Saccharomyces cerevisiae
Source: PubMed Central journal article supplement (PMC5118918; doi:10.1128/aem.02148-16), 2016-11-21
Supplement: AEM.02148-16_zam999117555so1.pdf [file AEM.02148-16_zam999117555so1.pdf]

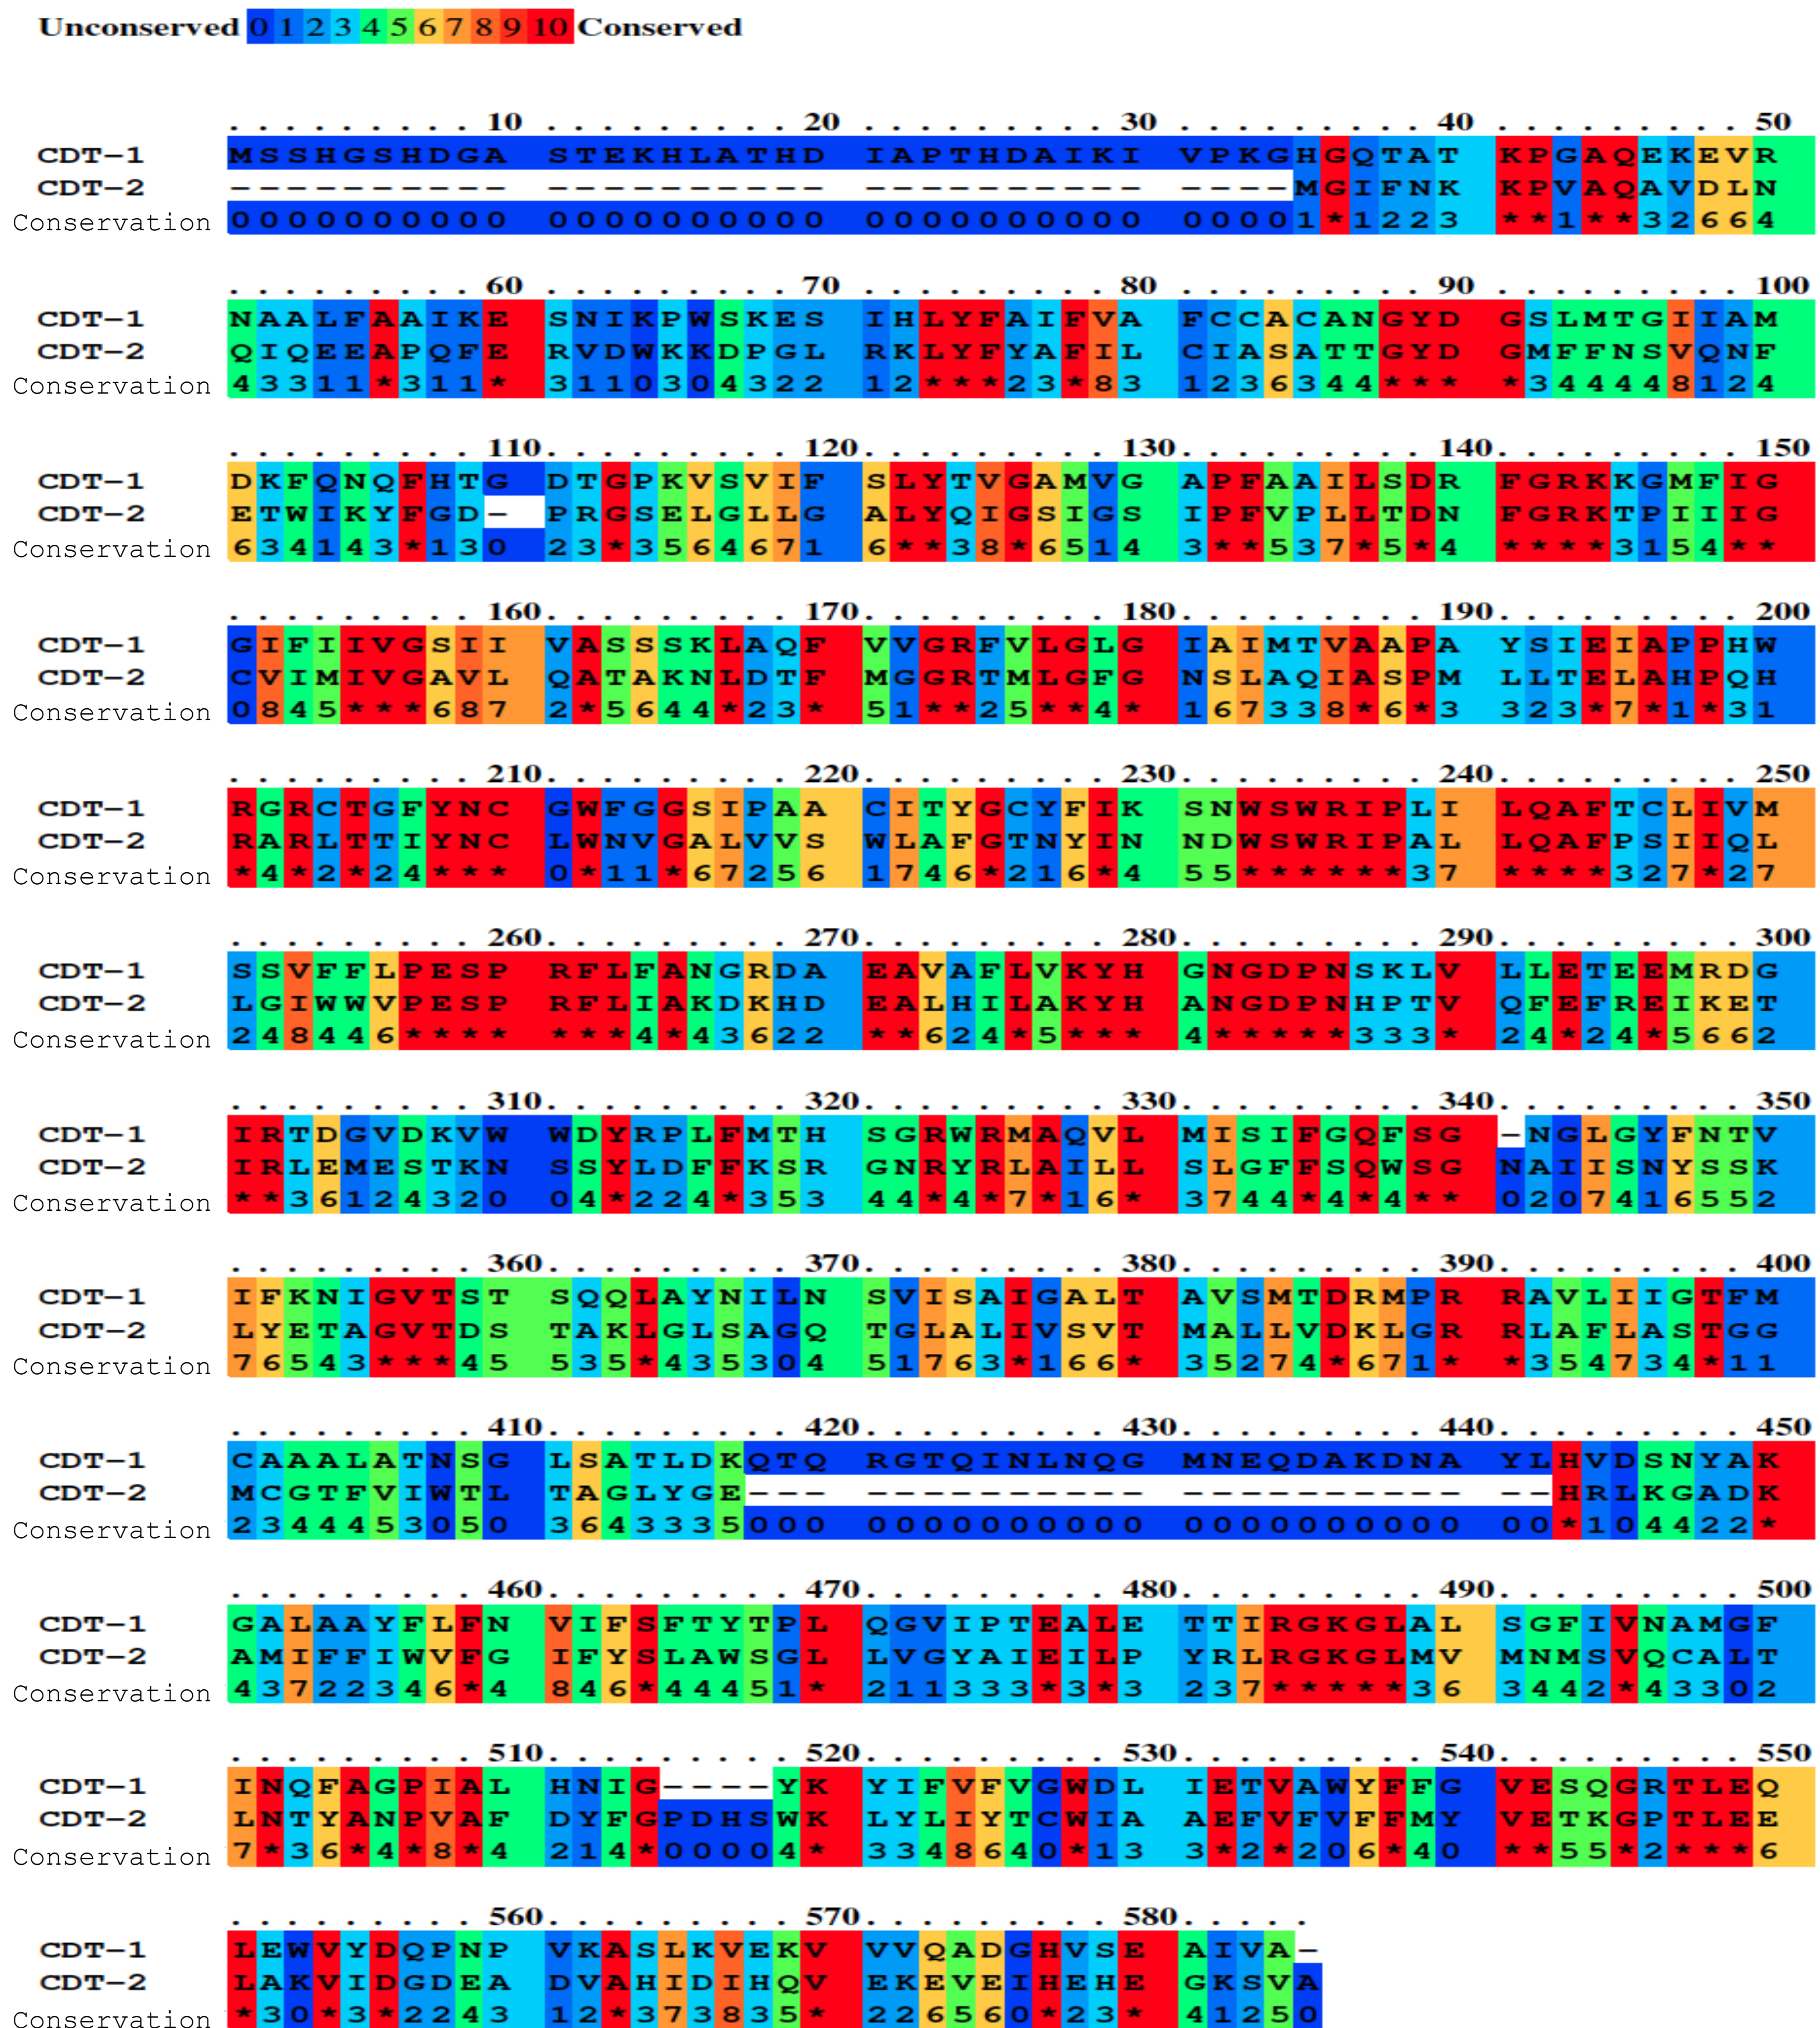

**Fig. S1:** Amino acid sequence alignment of *N.crassa* CDT-1 and CDT-2 transporters using the PRALINE multiple sequence alignment program because of low sequence identity between CDT-1 and CDT-2 (1). Residues are color-coded based on conservation.

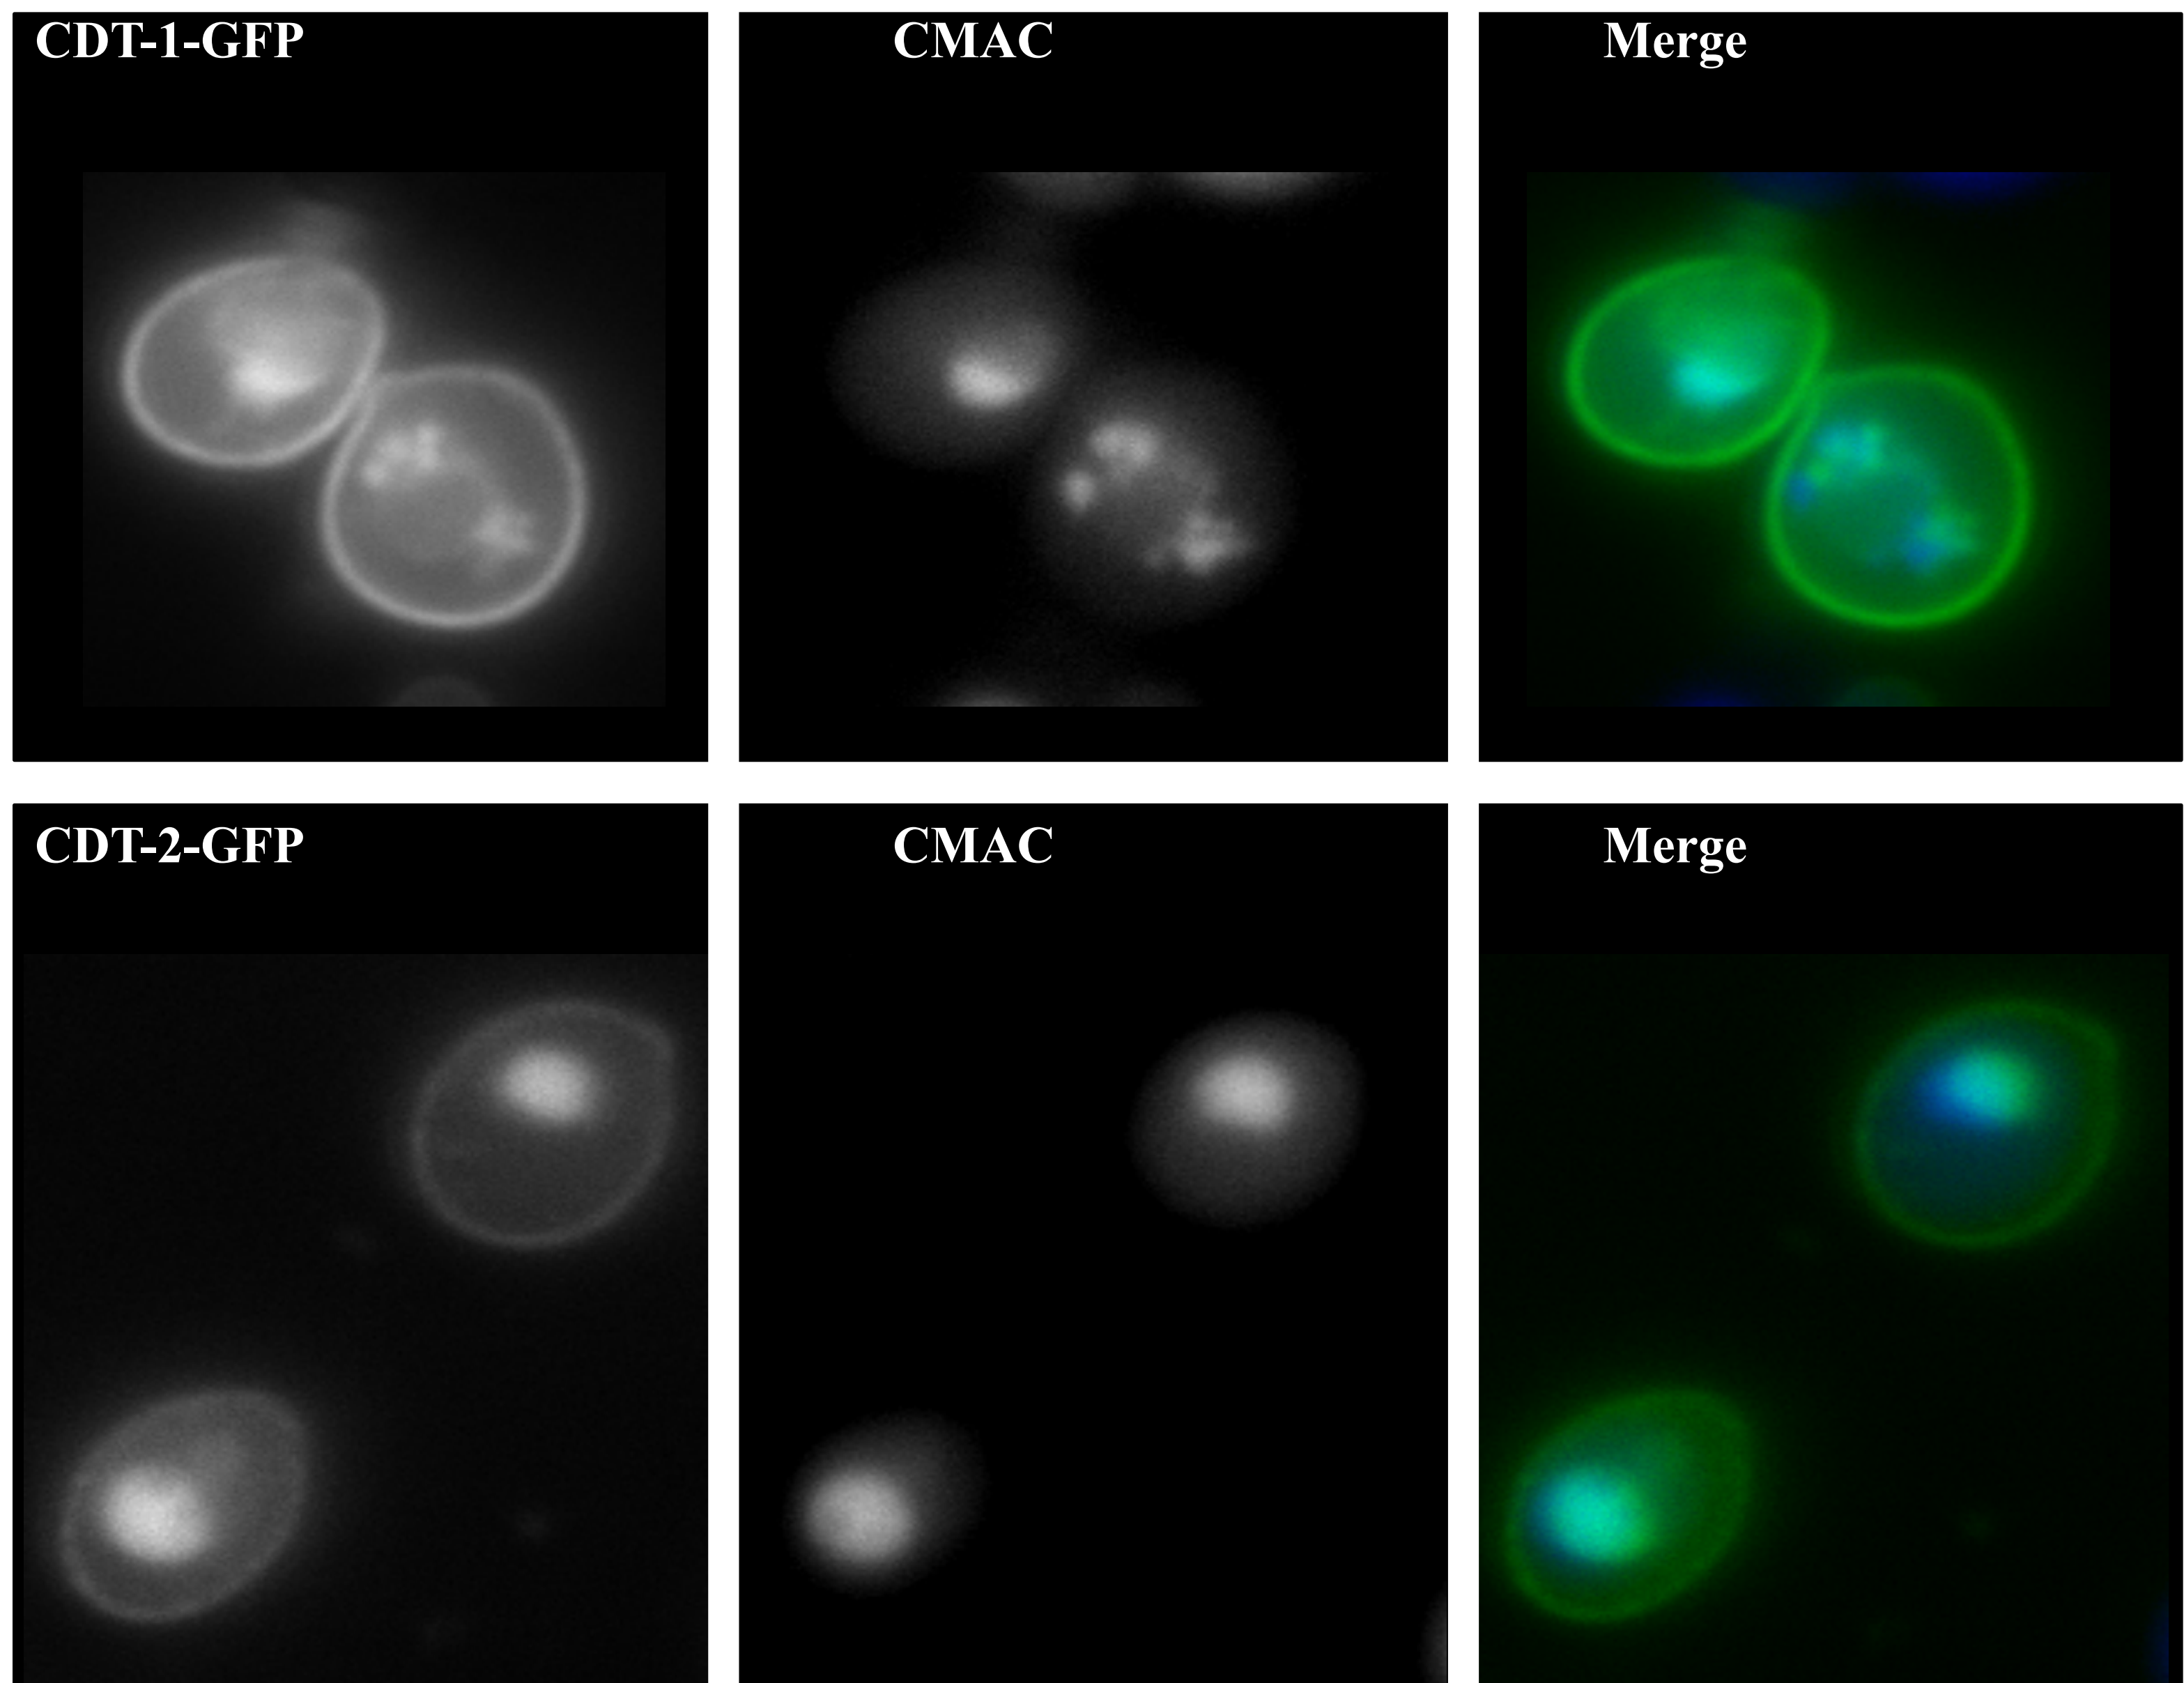

**Fig. S2:** To visualize vacuoles, WT cells expressing CDT-1-GFP or CDT-GFP were incubated with 250  $\mu$ M of the vacuolar lumen marker CMAC (Life Technologies, Carlsbad, CA) for 20 min, washed and resuspended prior to imaging.

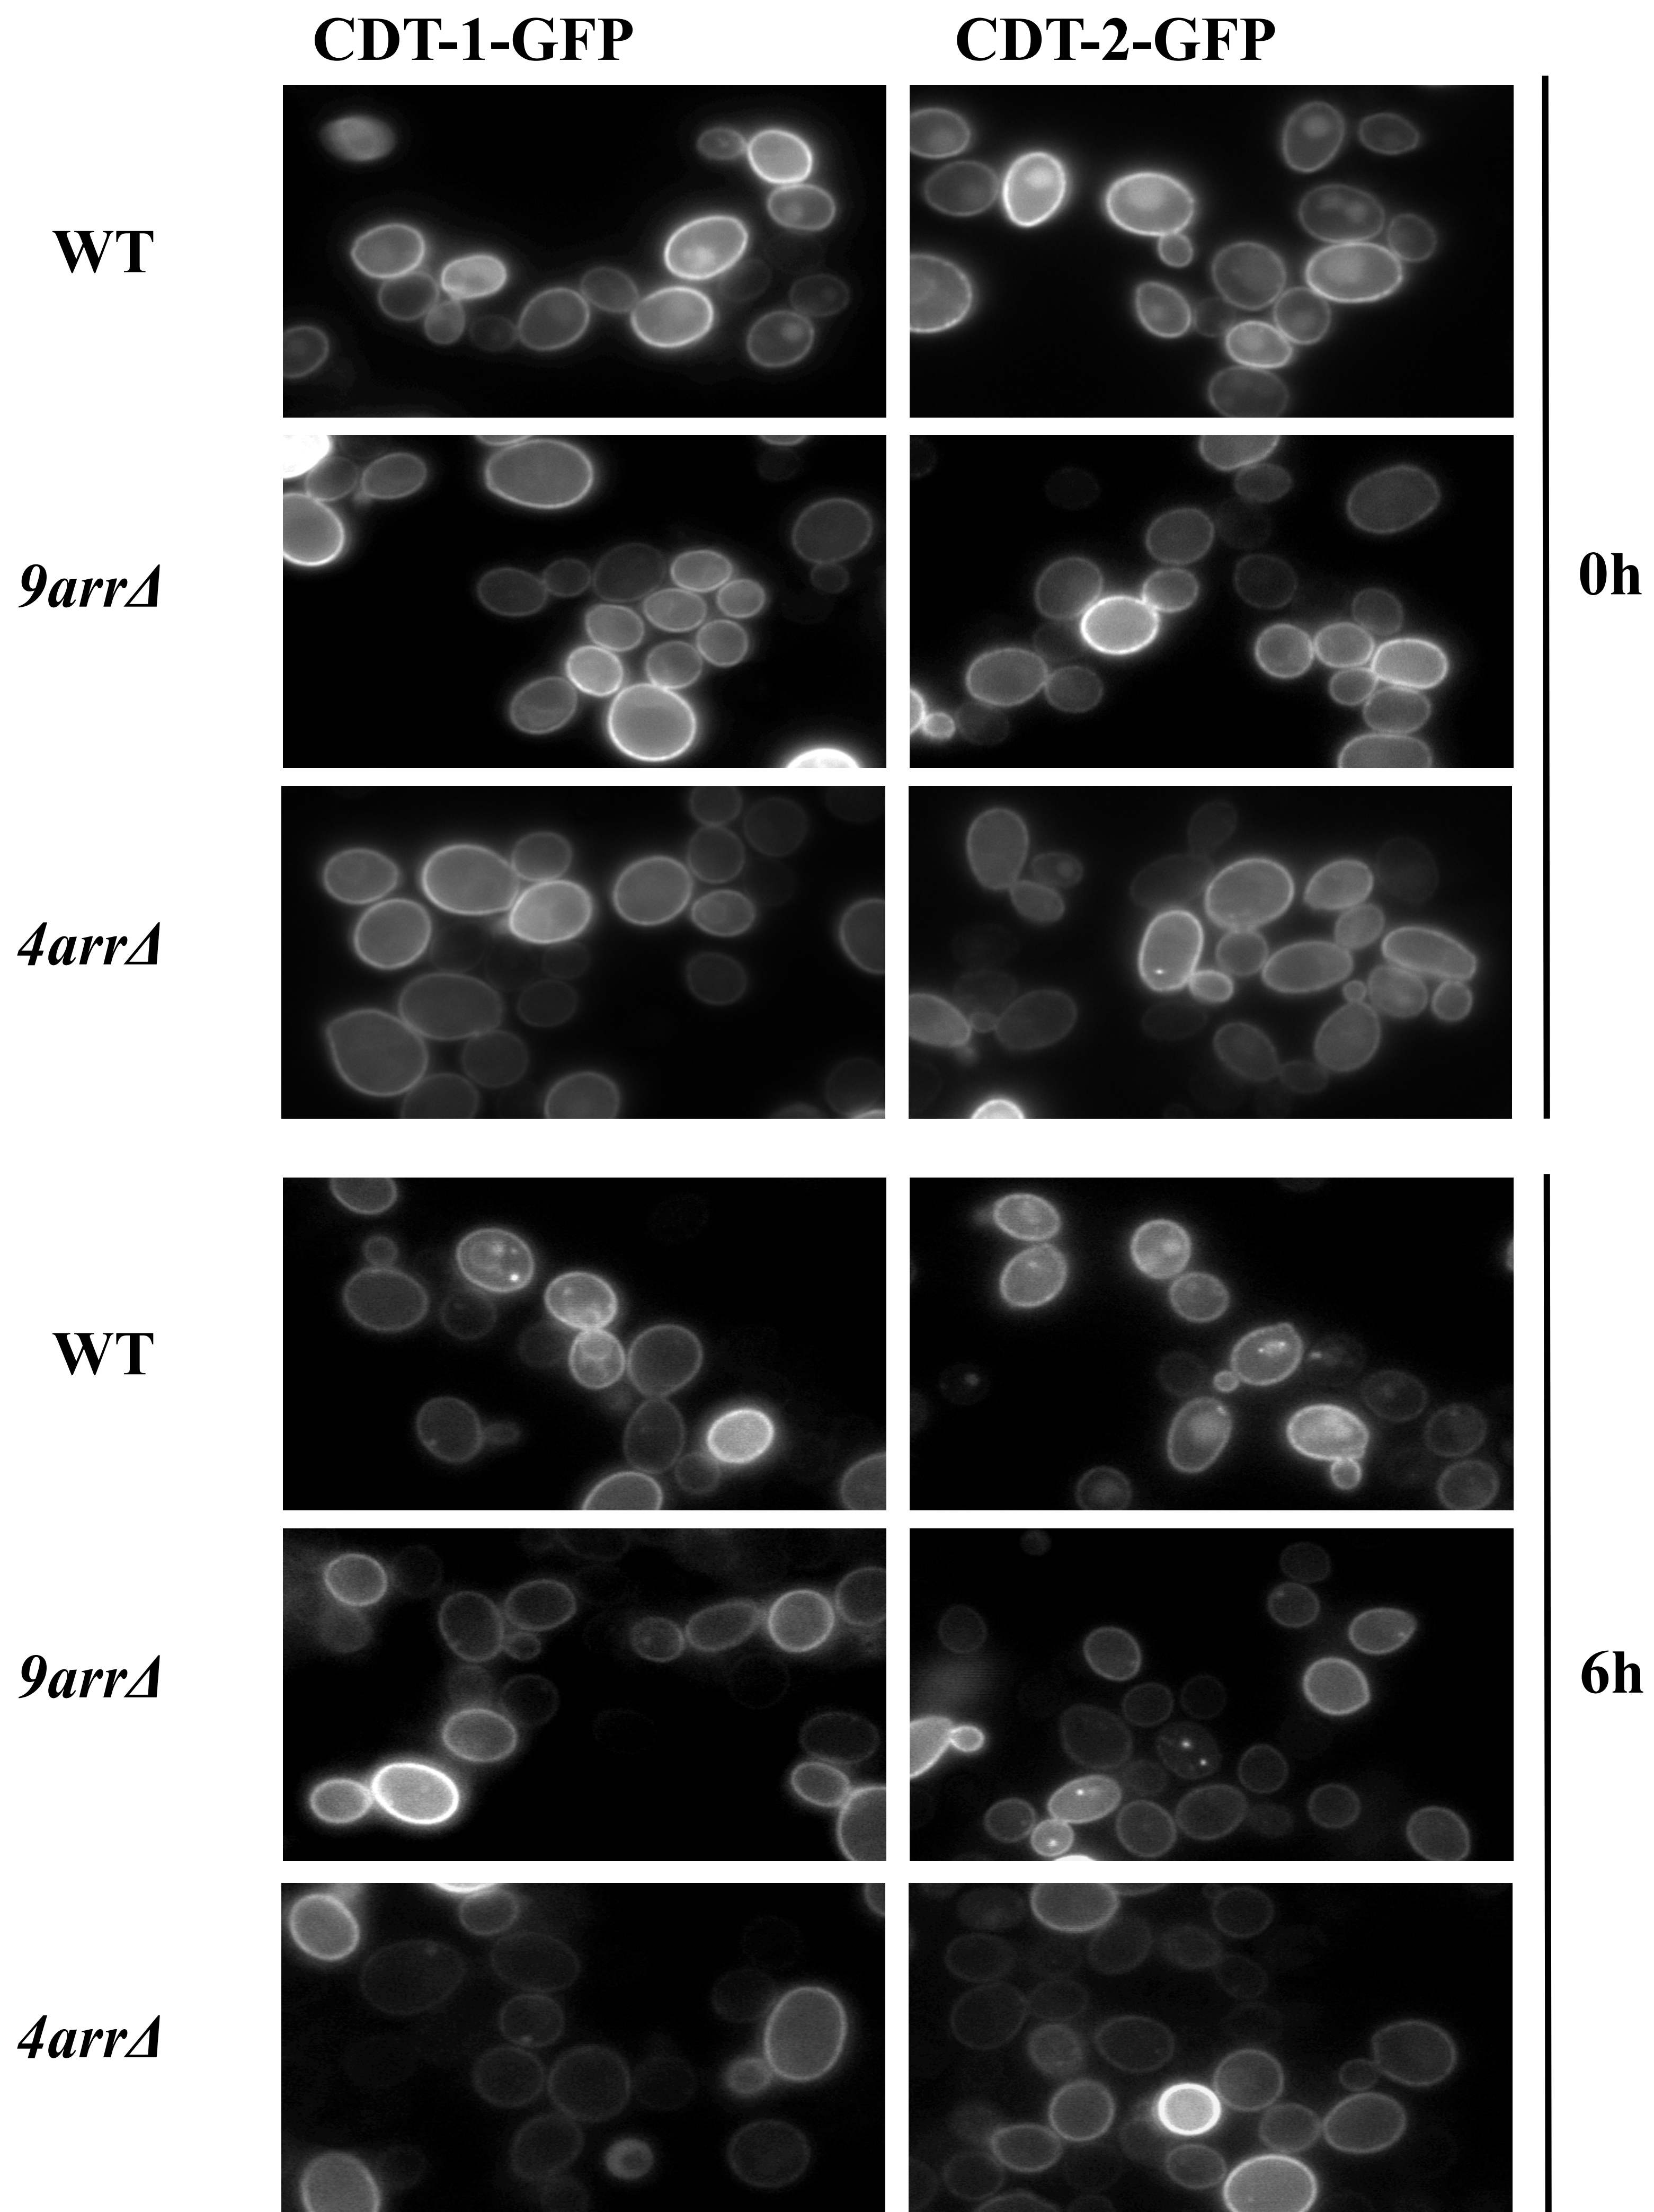

**Fig. S3:** Localization of WT, *9arrΔ*, or *4arrΔ* cells expressing CDT-1 or CDT-2 under normal conditions, or after 6 hours of anaerobic growth.

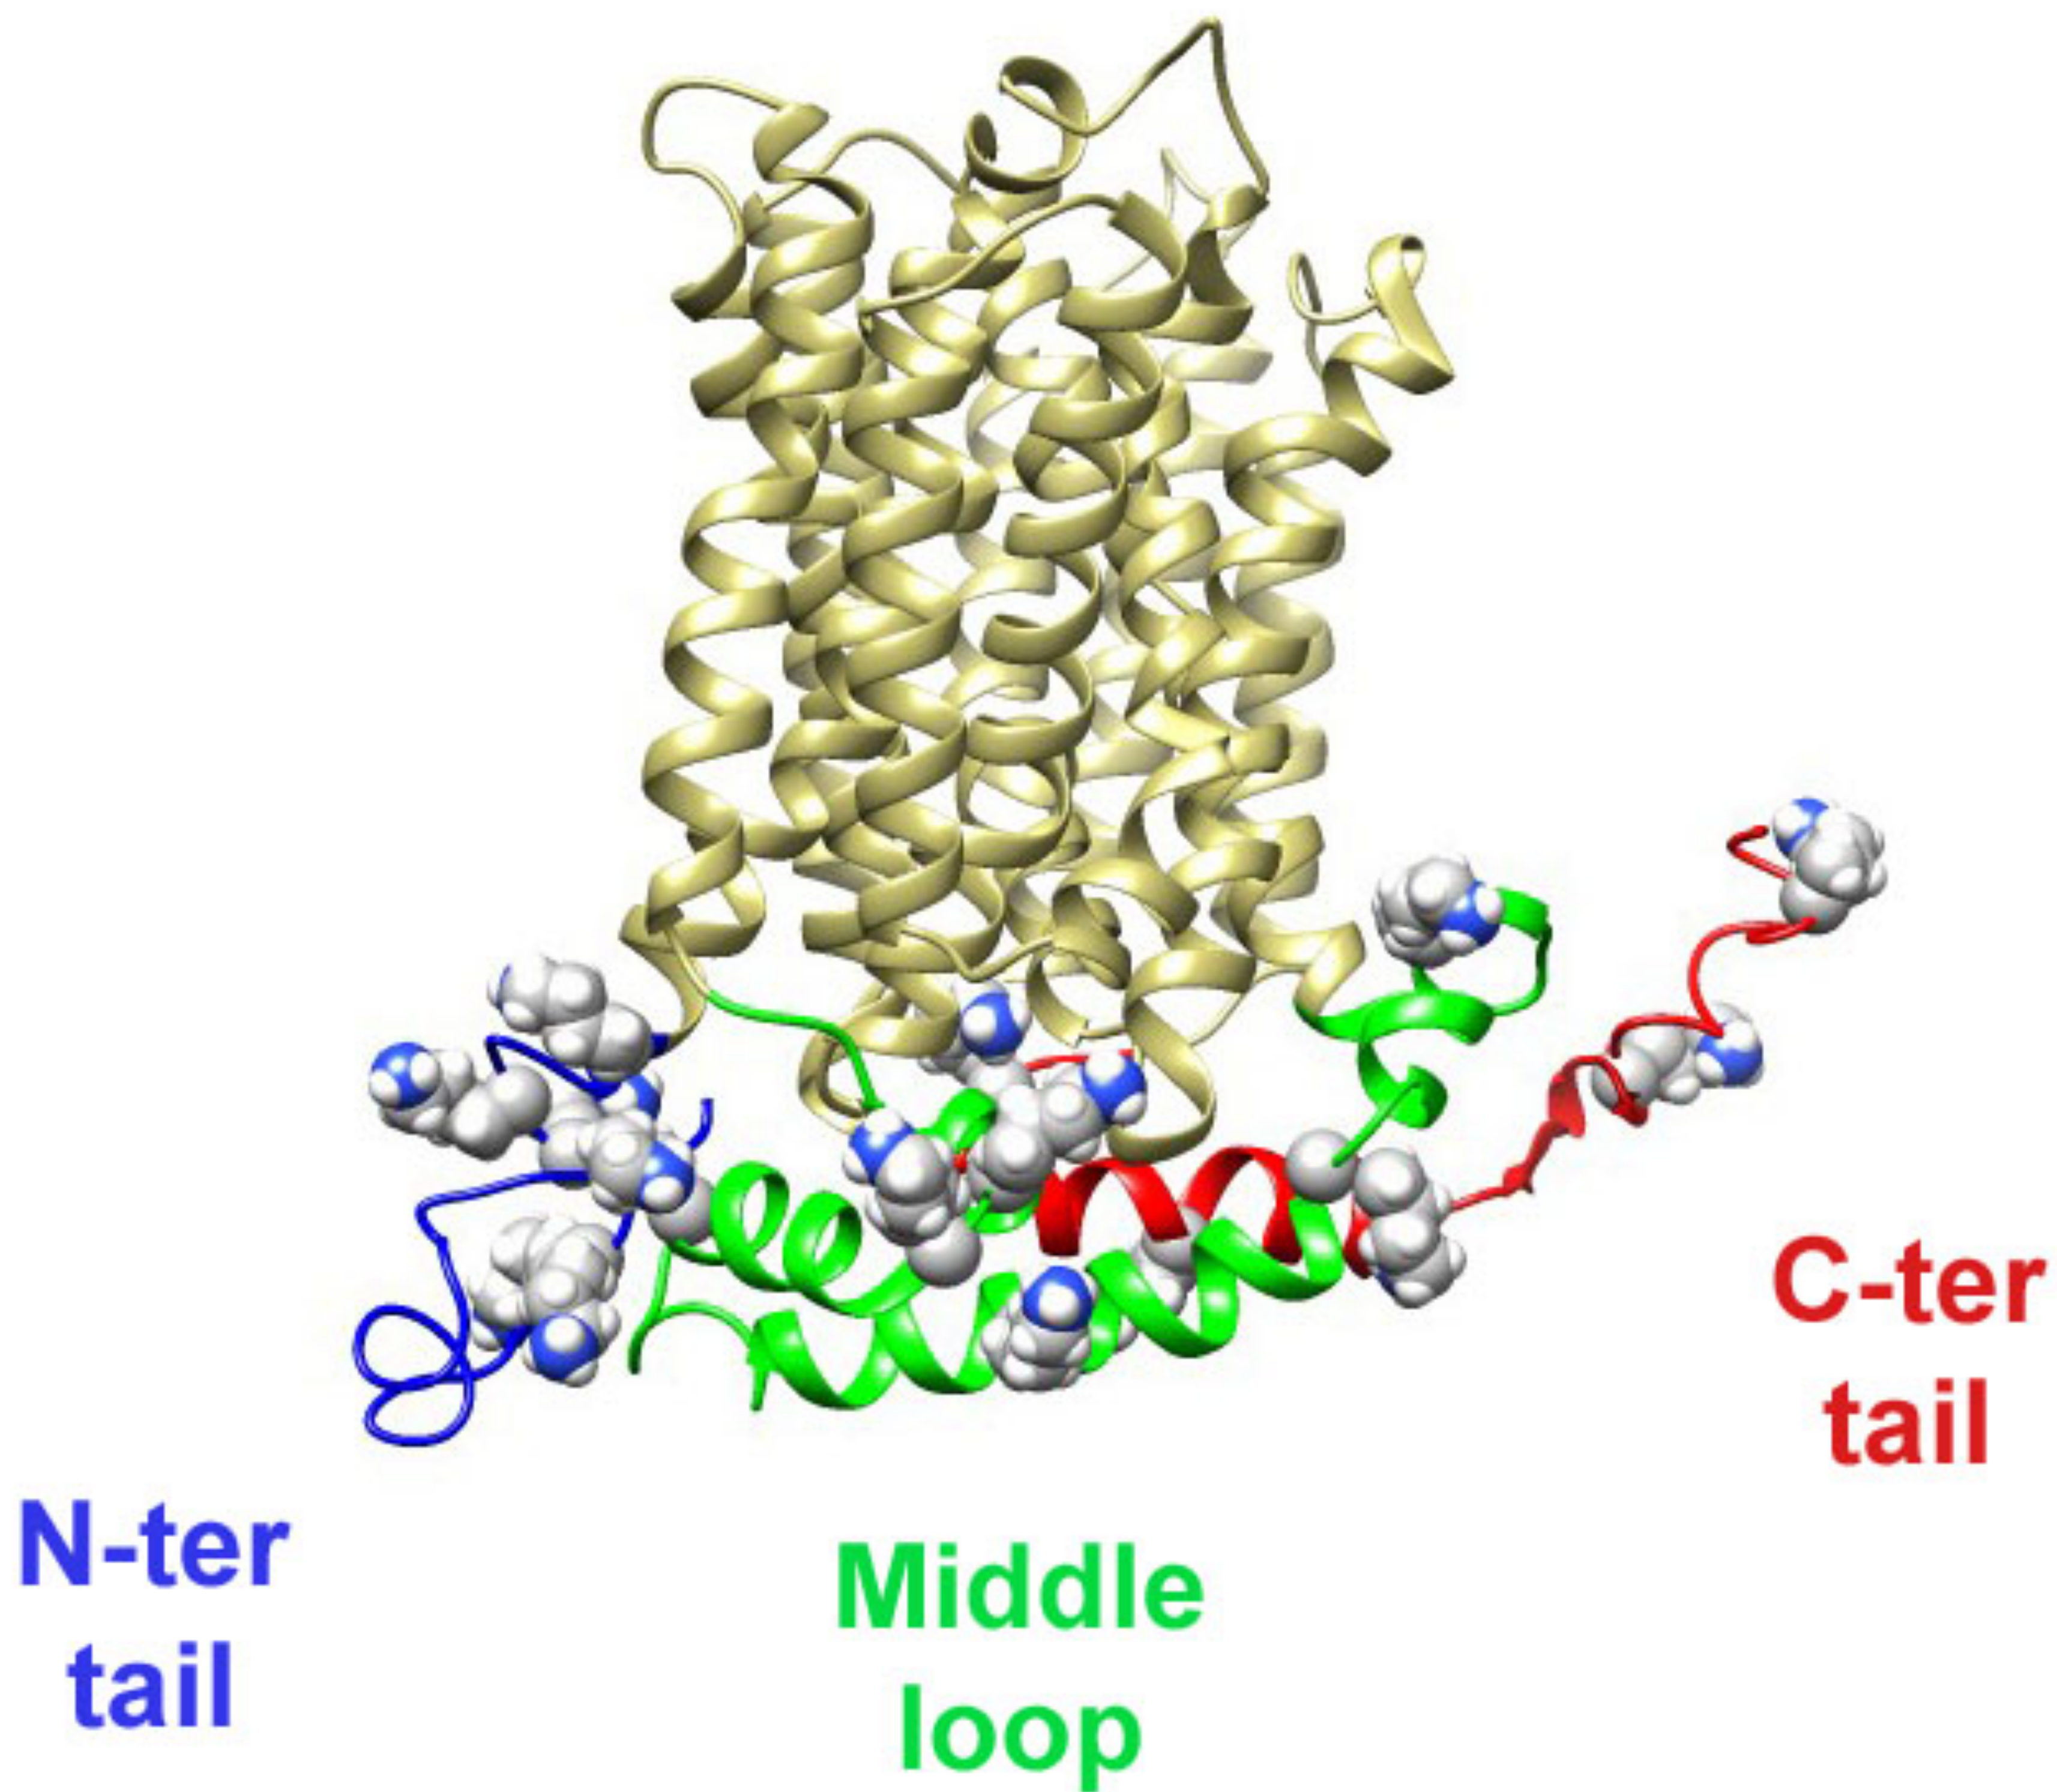

**Fig. S4:** I-TASSER model for CDT-2 showing Lys residues mutated to Arg in the N-terminal tail (blue), the interdomain middle loop (green), and the C-terminal tail (red).



*PGK1<sub>prom</sub>*  
CDT2-GFP

*CCW12<sub>prom</sub>*  
CDT2-GFP

WT

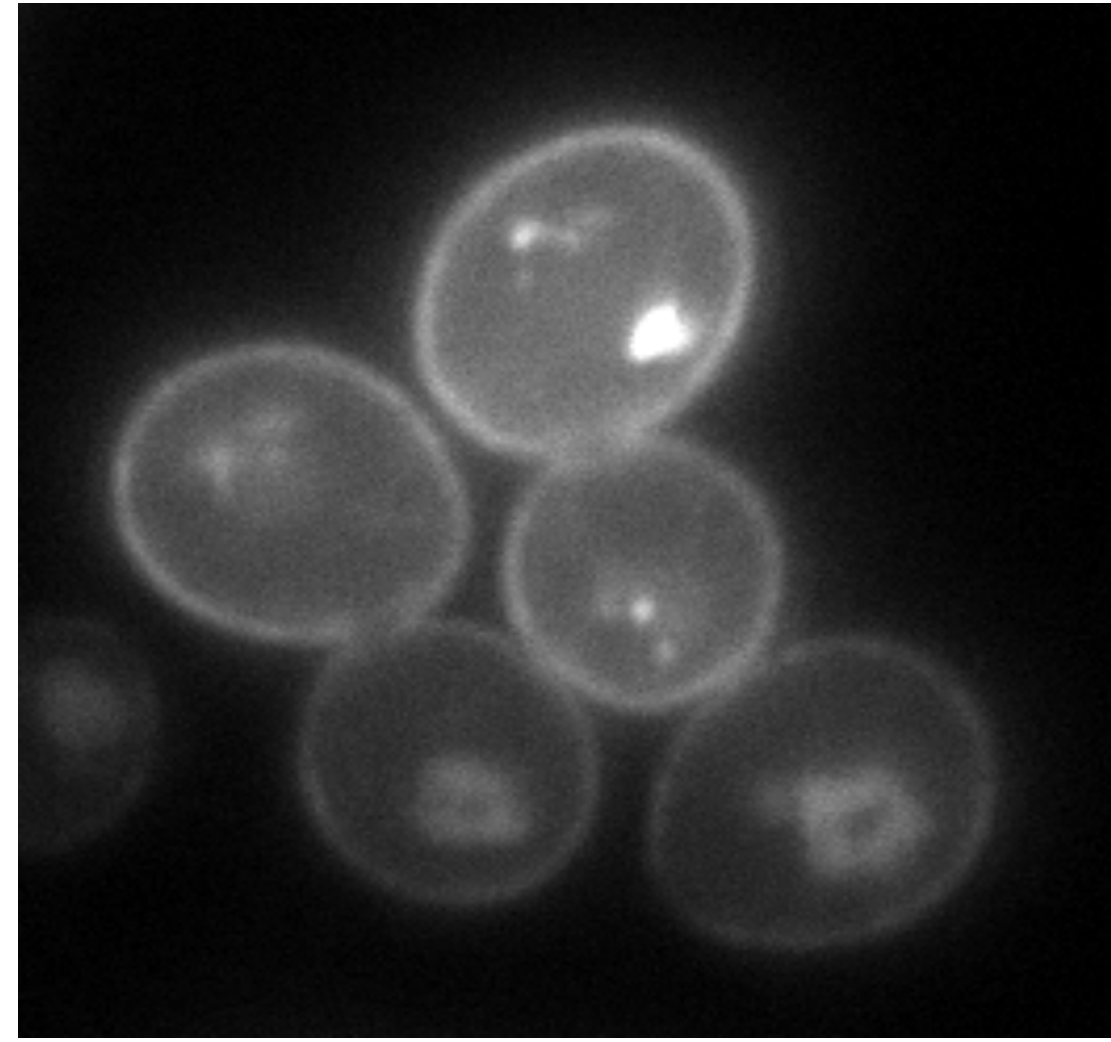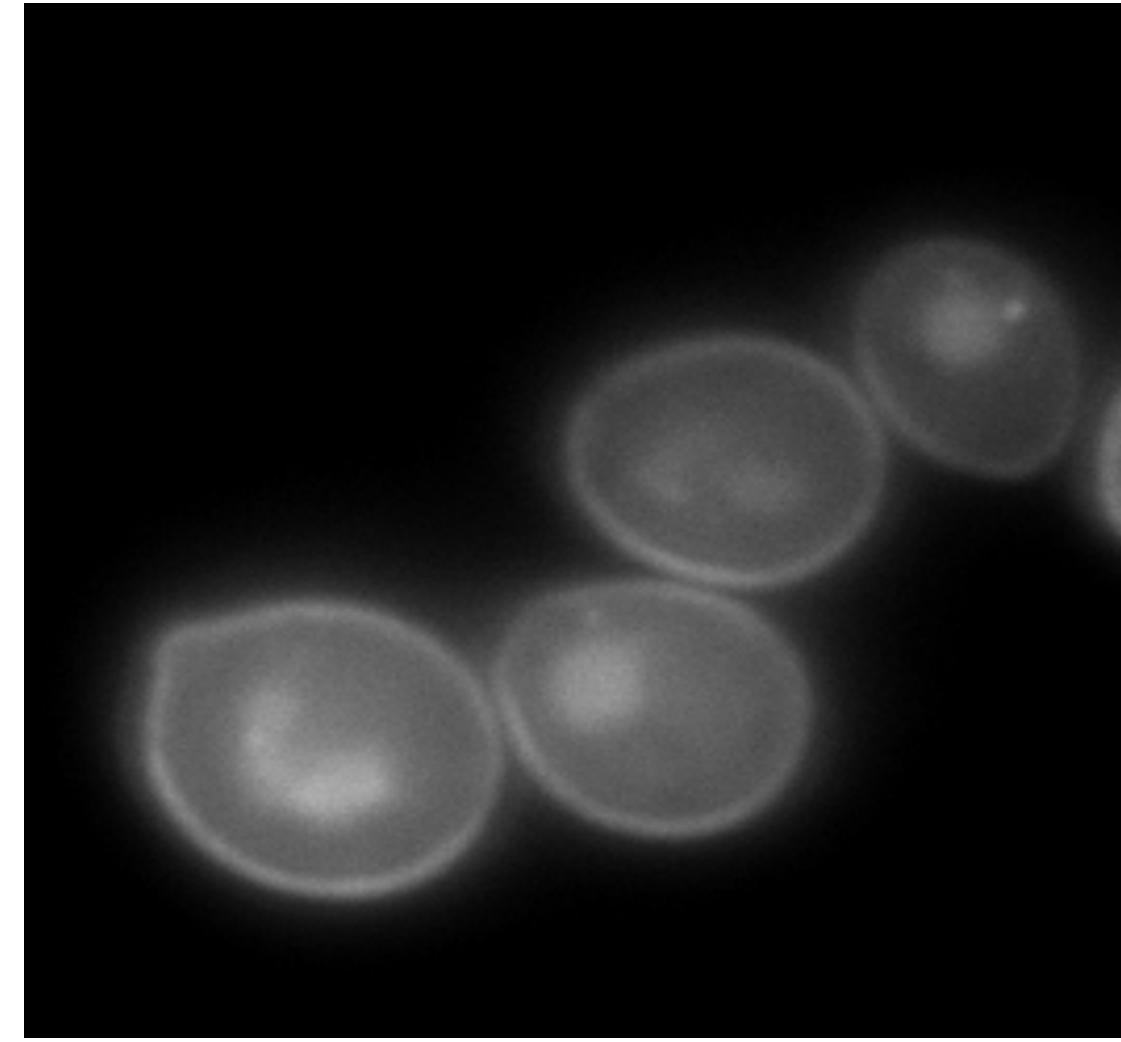

*9arrΔ*

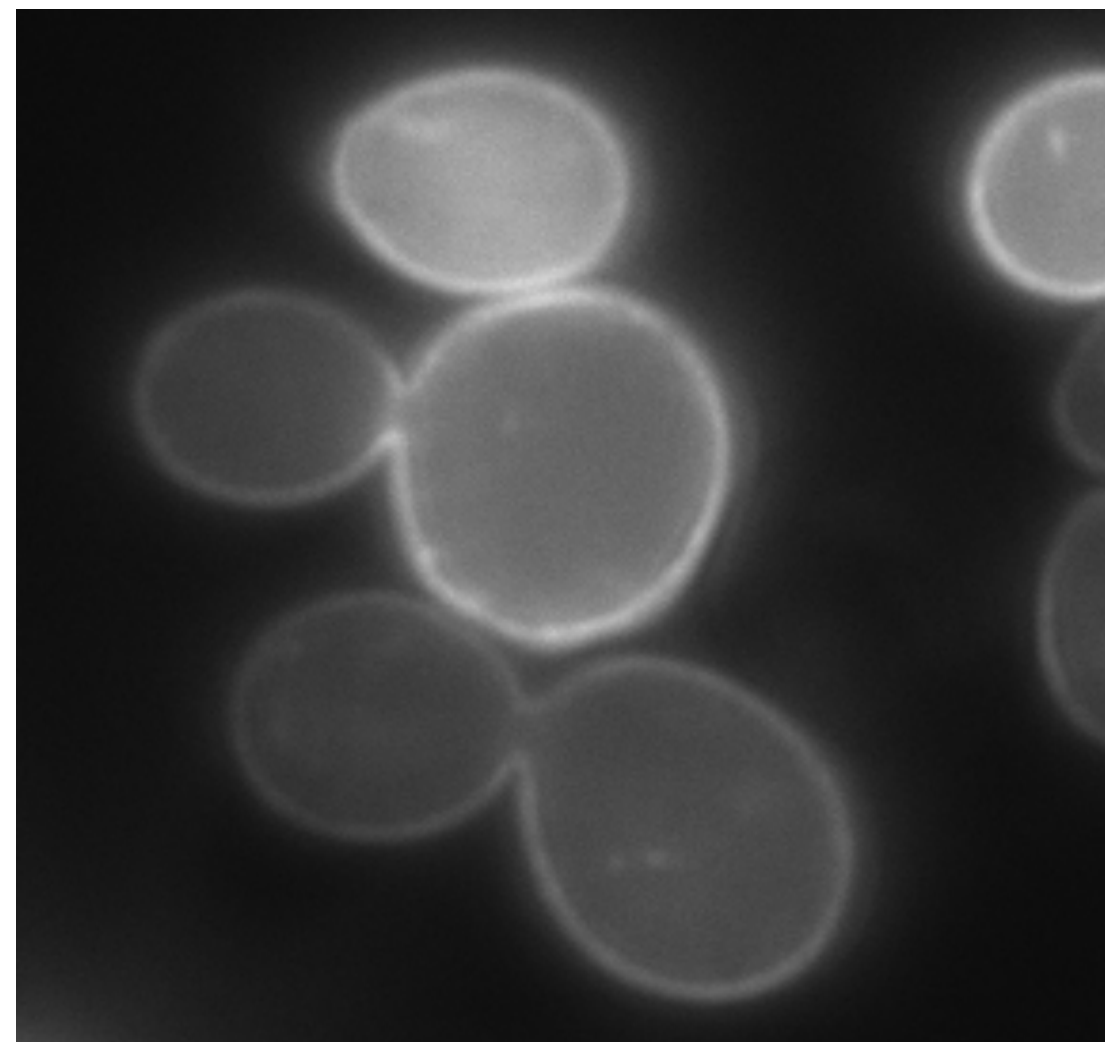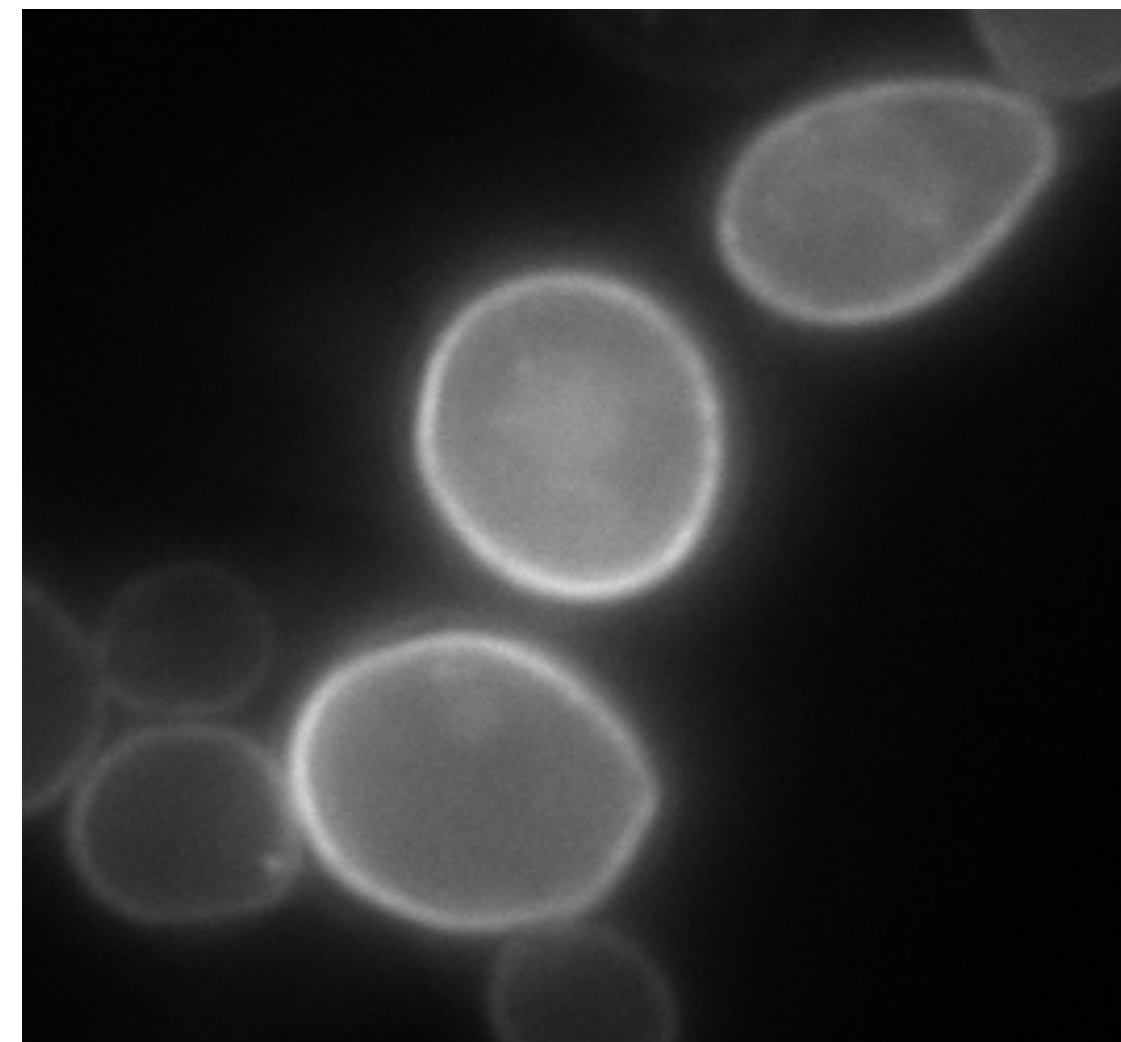

*4arrΔ*

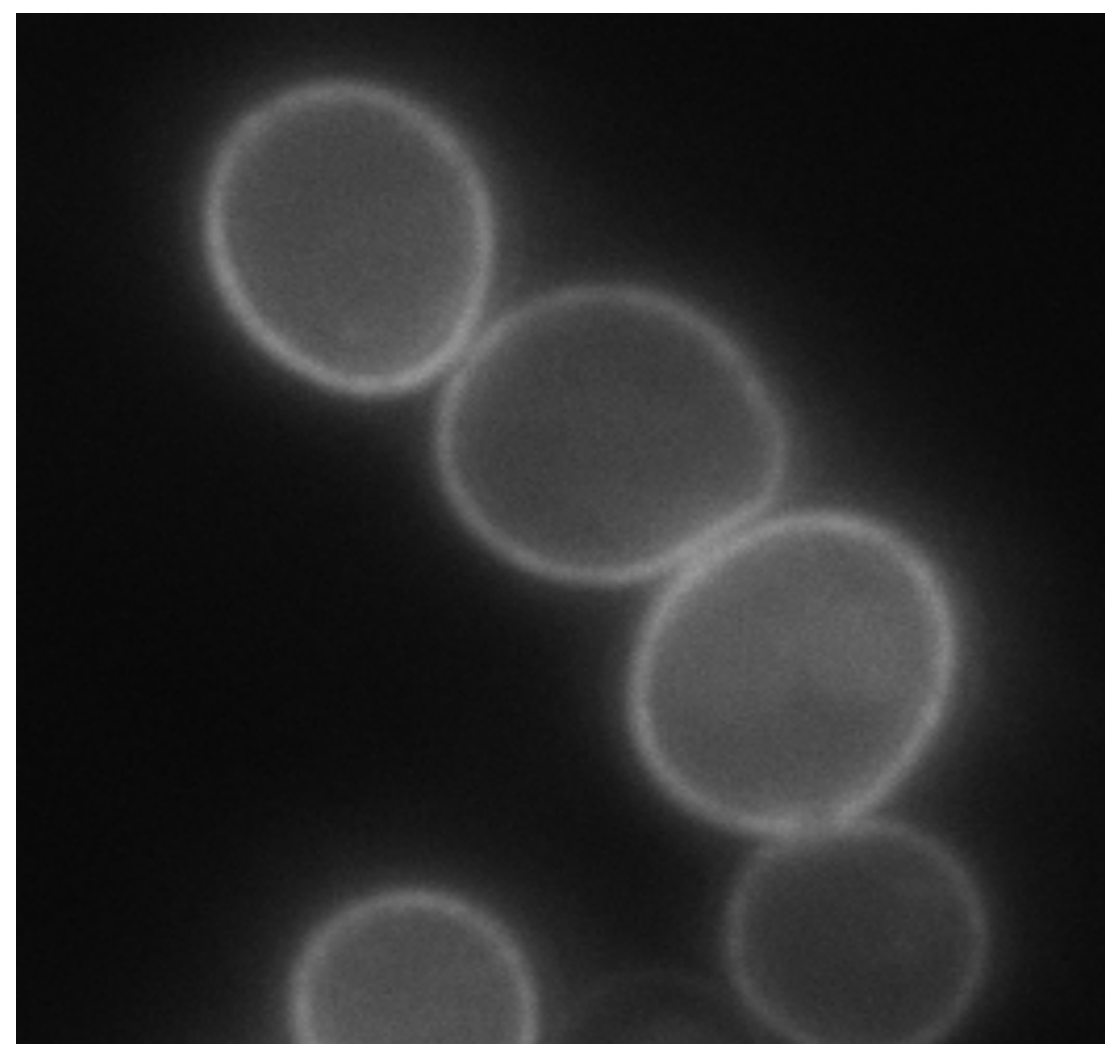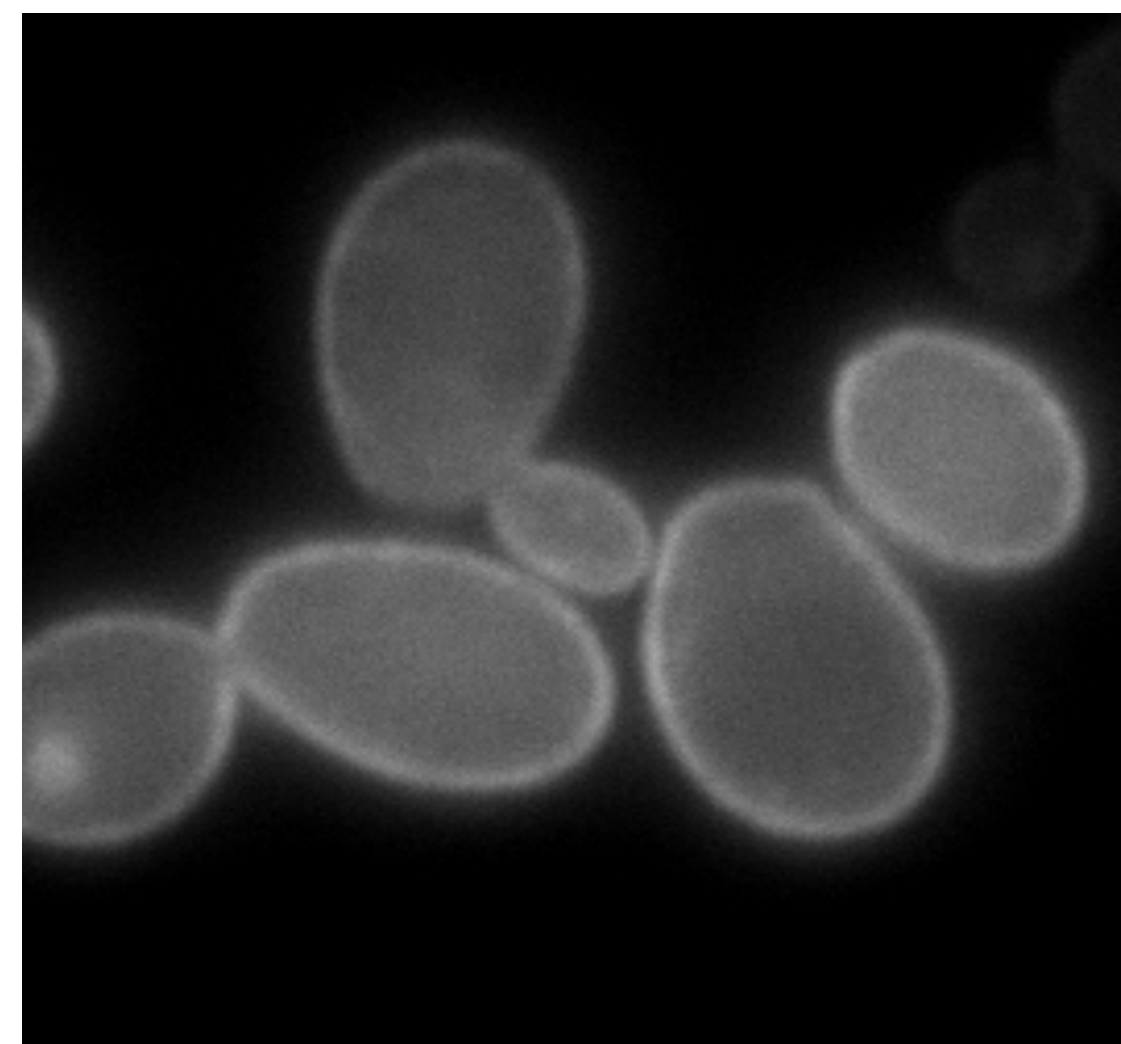

**Fig. S6:** Representative images showing equivalent levels of CDT-2-GFP expression under the control of either the *PGK1<sub>prom</sub>* or the *CCW12<sub>prom</sub>*, as indicated.

```

creD      -MALSFSSGGGSASHAKYFDIRLDEDYIVFRGGEQEASAHLGKLVLCVSEPISIKHIR 59
NCU03887  MSFTNFFTSVTGKHAYTYFDIRLESDFIVFRGNEHESAGQLLQGTVVLCLPAPLKIEDVH 60
          .**:. . .*****:.*:***** *:*:*. *.*:***: *:.*:..:
creD      LHLTGISRVCWHLPSSSAGGGRKN--WRERVFYEKTWKFRD-A-----GKSKT 104
NCU03887  LRLTGTLMHMSWNDPRVTAAGISNHKIDRTSTIYSHRWKPFVGVGAENQSIGSPNGLMSRG 120
          *:*** :.*. * :*. * :. * :*: ** . * :
creD      EILPAGNYEYPFDVILEGSMPESEVEGLSDTYVTYRFKAEIGR-KYAKDIVVRRPLRIIRT 163
NCU03887  VTLPAGNYEWPPELMLPGDMTESVEGLREASLTYKPKATVARGKLAYDLHAYKRLRIIRT 180
          *****:***:.* * ***** :. :*:** :.* * * * : . : *****
creD      LESSALELSHAMSVENIWPNKIEYSISTPTKAVIFGTSIRVDFKLIPLLKGLGIGQIISQ 223
NCU03887  LDPSTLEFLHTMSVENIWPNKIEYSIMIPKKAVVFGSTIPLQTRFTPLLKGLELGEITIR 240
          * : * : * : * : * : * : * : * : * : * : * : * : * : * : * : * :
creD      LIETHDLTLNPEDPDAIRNTYKTRTIINDEHTIDEE--NSLEIIDEAAEGFQFSRTLTL 281
NCU03887  LLEVHEFILQSHSGYGVREHKKEREISVW-KIPIEREKHWQDVIEDTGQEGWVMNTGLDL 299
          *:*.*: : * : .. :*: * . : : * : * . * * . ** : :. ***
creD      PKTLTRCLQDTRGIVKVRHKLKFRVQLLNPDGHISELRATLPVSIFISPNLAIDNNNL 341
NCU03887  PRTLKGCVDVNAHGIVKVRHKLKVVLLALHNPDGHISELRATLPVSIFISPNMPLDEEGL 359
          *:** :*:** :*:*****. : * *****: :*: **
creD      VDSSPQTTQRALDDLAQQAPPLYGEHQFDQLYSEVDPSGYRTPGPGSGPGTFFGTLRN 401
NCU03887  VRQMPNGTT--PGDVVAAPPSYDEHTLDQLYEDMEPTGLQTPAGMA---SPLYGHSRAG 414
          * . * : * * :. * * * * :****:***: * : * : * : * :
creD      SAENLASMNAITHTDISASALHHRLVNLDLRGHGRVSASEHDH-LGVPSDNGPPSGSN 460
NCU03887  SVENLAALLMHSTAVPPAALTSRLQNVSLPSSRSTSWNDGDSETATPNNGPADSV--- 471
          *.****: : * : :** * * * :.* . * : : . . . :*** ..
creD      GSNTHAPGSPELSRRASDEDVHDNIPSGMATPFIPHSAELETLSRVPSYSTAVRSSVRPH 520
NCU03887  --HSSAFPSAPLTRQNSGDNITAEAMSGYHTPEHLDFSGIMELSKVPSYHTAVKTPVRPI 529
          .: * * * : * : : : * * * . : : * : * * * : * : * :
creD      ----DSDLPDYQAVVAETVHMSAPQSPQQAHIRGSGTGGRGSDSY----FS----- 562
NCU03887  AYPEGTVLPDYVAATSASG-STTPGSPELGHS---EAGDGASKVEERNQSRPEPPRRKSA 585
          : **** * : : : * * : . * : * * :. *
creD      ---APMDFHRPAFLHS-----RSHSHSDDERRIR-LTQARGRA 597
NCU03887  RSRLAFTLSHIPHIHSHSHHGHSHSESEDRRRHSSMMQAN--- 626
          : : * * : * * :****.*:*.* * : ** .

```

**Fig. S7:** Clustal Omega (Ver 1.2.1) protein sequence alignment (2) between *A. nidulans creD* (AN4170) and *N. crassa* NCU03887. These proteins share 42% amino acid sequence identity. The arrestin N and C domains (as predicted by <http://pfam.xfam.org/>) are highlighted in grey; the PPxY motifs are in red.

## Supplemental References

1. **Pirovano, W., Feenstra, K. A., & Heringa, J.** 2008. PRALINETM: a strategy for improved multiple alignment of transmembrane proteins. *Bioinformatics* **24**: 492-497.
2. **Sievers F, Higgins DG.** 2014. Clustal Omega, accurate alignment of very large numbers of sequences. *Methods Mol. Biol.* **1079**: 105-116.
